# Supplementary material for: Nontargeted Metabolomics by High-Resolution Mass Spectrometry to Study the In Vitro Metabolism of a Dual Inverse Agonist of Estrogen-Related Receptors β and γ, DN203368
Source: MDPI journal article supplement (doi:10.3390/pharmaceutics13060776), 2021-05-31
Supplement: s1 [file s1]

# Supplementary Materials: Nontargeted Metabolomics by High-Resolution Mass Spectrometry to Study the In Vitro Metabolism of a Dual Inverse Agonist of Estrogen-Related Receptors $\beta$ and $\gamma$ , DN203368

Sin-Eun Kim, Seung-Bae Ji, Euihyeon Kim, Minseon Jeong, Jina Kim, Gyung-Min Lee, Hyung-Ju Seo, Subin Bae, Yeojin Jeong, Sangkyu Lee, Sunghwan Kim, Taeho Lee, Sung Jin Cho and Kwang-Hyeon Liu

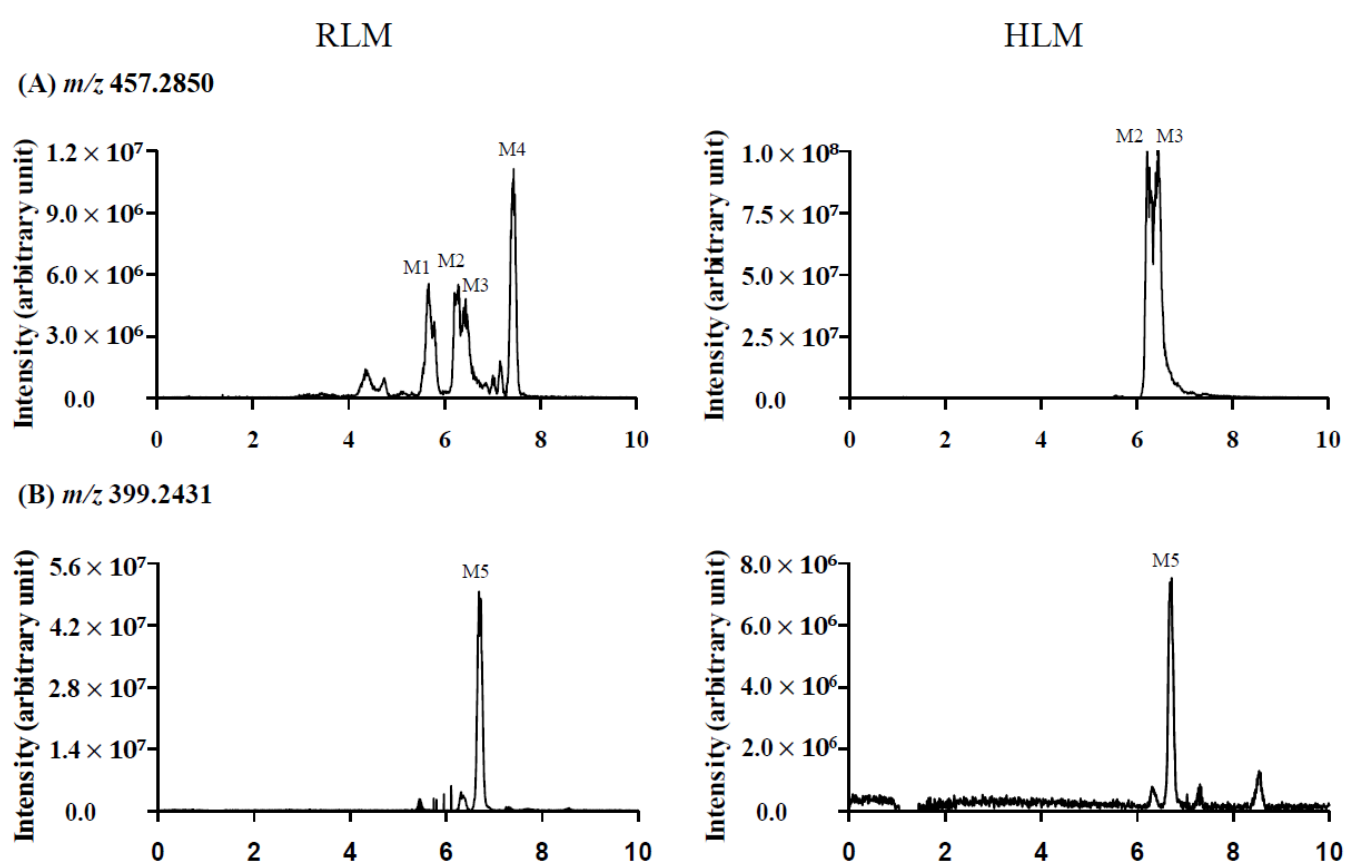

(C)  $m/z$  439.2744

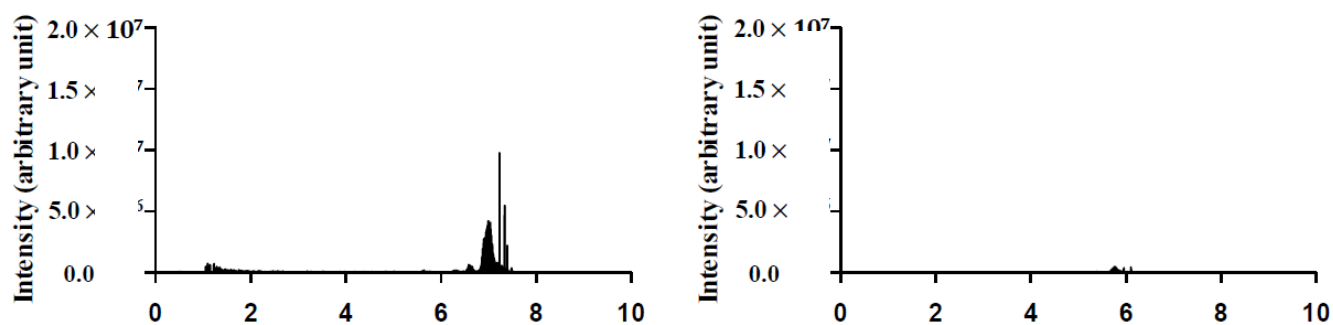

(D)  $m/z$  473.2799

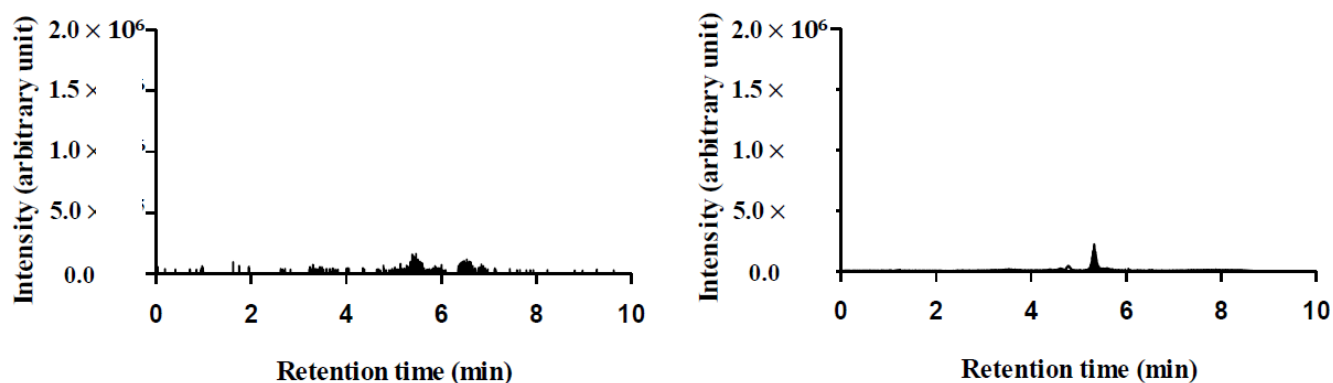

**Figure S1.** Extracted ion chromatograms (EIC) of DN203368 metabolites obtained from rat and human liver microsomal (RLM, HLM) incubates with DN203368 in the presence of NADPH generating system.

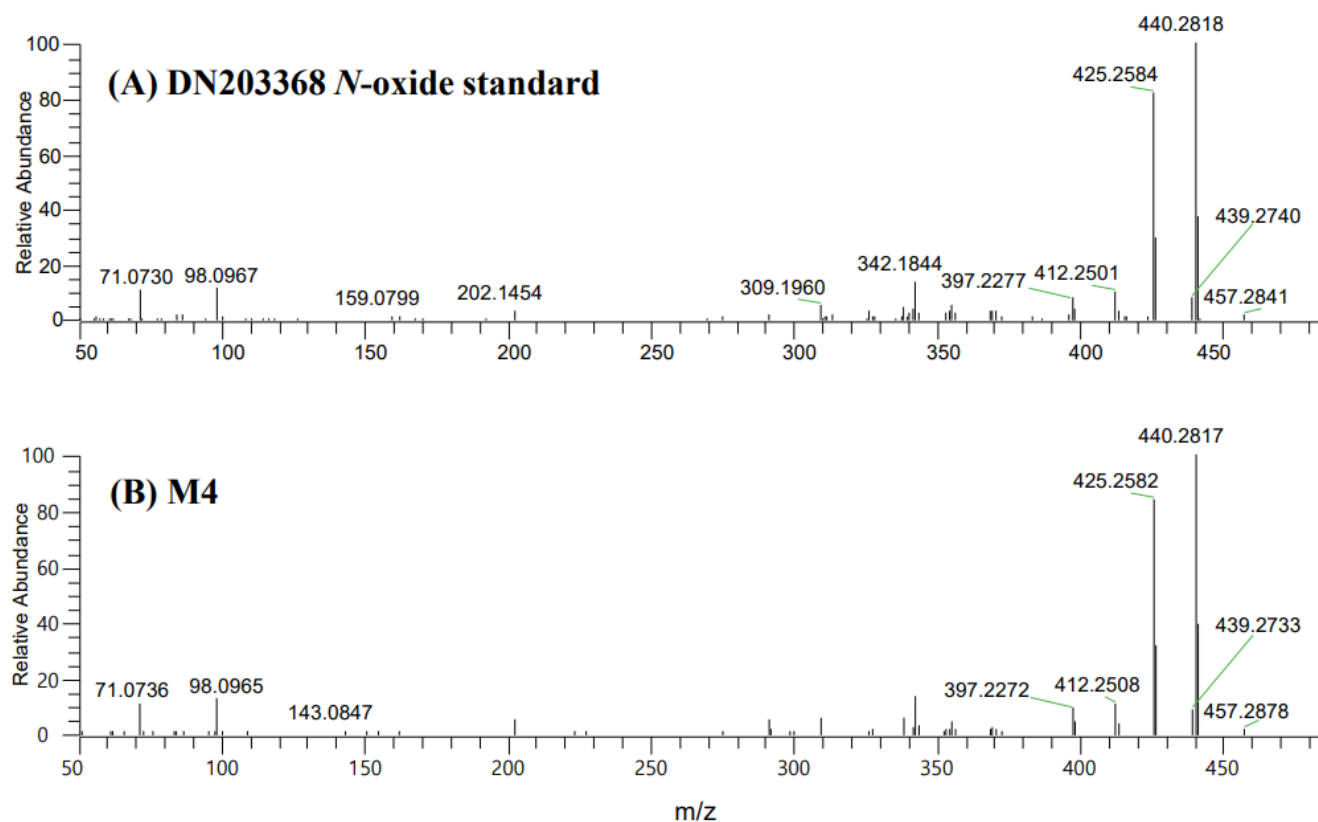

**Figure S2.** Product ion mass (MS/MS) spectra of DN203368 *N*-oxide standard (A) and metabolite M4 (B).
